# Supplementary material for: Engineering Antigens to Assemble into Polymer Particle Vaccines for Prevention of Streptococcus suis Infection
Source: MDPI journal article supplement (doi:10.3390/vaccines9121386), 2021-11-24
Supplement: s1 [file s1]

Supplementary Material

# Engineering antigens to assemble into polymer particle vaccines for prevention of *Streptococcus suis* infection

Zennia Jean C. Gonzaga <sup>1</sup>, Shuxiong Chen <sup>1</sup>, Mélanie Lehoux <sup>2</sup>, Mariela Segura <sup>2</sup> and Bernd H. A. Rehm <sup>1,3,\*</sup>

<sup>1</sup> Centre for Cell Factories and Biopolymers (CCFB), Griffith Institute for Drug Discovery, Griffith University, Don Young Road, Nathan QLD 4111, Australia; jean.gonzaga@griffithuni.edu.au (Z.J.C.G.); shuxiong.chen@griffith.edu.au (S.C.)

<sup>2</sup> Research Group on Infectious Diseases in Production Animals and Swine and Poultry Infectious Diseases Research Centre, Faculty of Veterinary Medicine, Université de Montréal, 3200 rue Sicotte, CP5000, St-Hyacinthe, QC J2S 7C6, Canada; melanie.lehoux@umontreal.ca (M.L.); mariela.segura@umontreal.ca (M.S.)

<sup>3</sup> Menzies Health Institute Queensland (MHIQ), Griffith University, Gold Coast, Qld 4222, Australia

\* Correspondence: b.rehm@griffith.edu.au; Tel.: +61737354233

**Table S1.** E. coli strains, plasmids and primers used in this study.

| Strains, Plasmids and Primers         | Relevant characteristics                                                                                                                              | References     |
|---------------------------------------|-------------------------------------------------------------------------------------------------------------------------------------------------------|----------------|
| <b>1. Bacterial strains</b>           |                                                                                                                                                       |                |
| <i>E. coli</i>                        |                                                                                                                                                       |                |
| XL1-Blue                              | <i>recA1 endA1 gyrA96 thi-1 hsdR17 supE44 relA1 lac</i> [F' <i>proAB lacIq lacZ</i> Δ <i>M15 Tn10</i> (Tetr)]                                         | Stratagene     |
| ClearColiTM BL21(DE3)                 | F– <i>ompT hsdSB (rB– mB–) gal dcm lon</i> λ(DE3 [ <i>lacI lacUV5-T7 gene 1 ind1 sam7 nin5</i> ]) <i>msbA148 ΔgutQΔkdsD ΔlpxLΔlpxMΔpagPΔlpxPΔeptA</i> | Lucigen        |
| <i>S. suis</i>                        |                                                                                                                                                       |                |
| <i>S. suis</i> serotype 2 strain P1/7 | Challenge strain in this study that was isolated from a field case of meningitis in a pig                                                             | [1]            |
| <b>2. Plasmids</b>                    |                                                                                                                                                       |                |
| pET14b                                | Amp <sup>R</sup> ; T7 promoter                                                                                                                        | Novagen        |
| pMCS69                                | Cm <sup>R</sup> ; T7 promoter; pBBR1MCS derivative containing codon optimised genes <i>phaA</i> and <i>phaB</i> from <i>C. necator</i>                | [2]            |
| pET14b_PhaC-RV1626                    | pET-14b_PhaC derivative containing RV1626                                                                                                             | [3]            |
| pET14b_PhaC                           | pET-14b derivative containing <i>phaC</i> gene fragment                                                                                               | [4]            |
| pUC57_38                              | pUC57 derivative containing <i>E. coli</i> codon optimized 38 fragment flanked by <i>XbaI/SpeI</i> sites                                              | This study     |
| pUC57_enol                            | pUC57 derivative containing <i>E. coli</i> codon optimized enol fragment flanked by <i>XhoI/BamHI</i> sites                                           | This study     |
| pET14b_PhaC-enol                      | Codon optimized enol fragment from pUC57_enol replacing RV1626 into <i>XhoI/BamHI</i> sites of pET14b_PhaC-RV1626                                     | This study     |
| pET14b_38-PhaC-enol                   | Codon optimized 38 fragment from pUC57_38 inserted into <i>XbaI/SpeI</i> sites of pET14b_PhaC-enol                                                    | This study     |
| pUC57_SSU1                            | pUC57 derivative containing <i>E. coli</i> codon optimized SSU1 fragment flanked by <i>XbaI/SpeI</i> sites                                            | This study     |
| pUC57_SSU2                            | pUC57 derivative containing <i>E. coli</i> codon optimized SSU2 fragment flanked by <i>XhoI/BamHI</i> sites                                           | This study     |
| pET14b_PhaC-SSU2                      | Codon optimized enol fragment from pUC57_SSU2 replacing RV1626 into <i>XhoI/BamHI</i> sites of pET14b_PhaC-RV1626                                     | This study     |
| pET14b_SSU1-PhaC-SSU2                 | Codon optimized 38 fragment from pUC57_SSU1 inserted into <i>XbaI/SpeI</i> sites of pET14b_PhaC-SSU2                                                  | This study     |
| <b>3. Primers</b>                     |                                                                                                                                                       |                |
| 5'-3'                                 |                                                                                                                                                       |                |
| T7 promoter                           | TAATACGACTCACTATAGGG                                                                                                                                  | GenScript, USA |
| T7 terminator                         | GCTAGTTATTGCTCAGCGG                                                                                                                                   | GenScript, USA |

Amp<sup>r</sup>, ampicillin resistance;; Tet<sup>r</sup>, tetracycline resistance; Cm<sup>r</sup> chloramphenicol resistance.

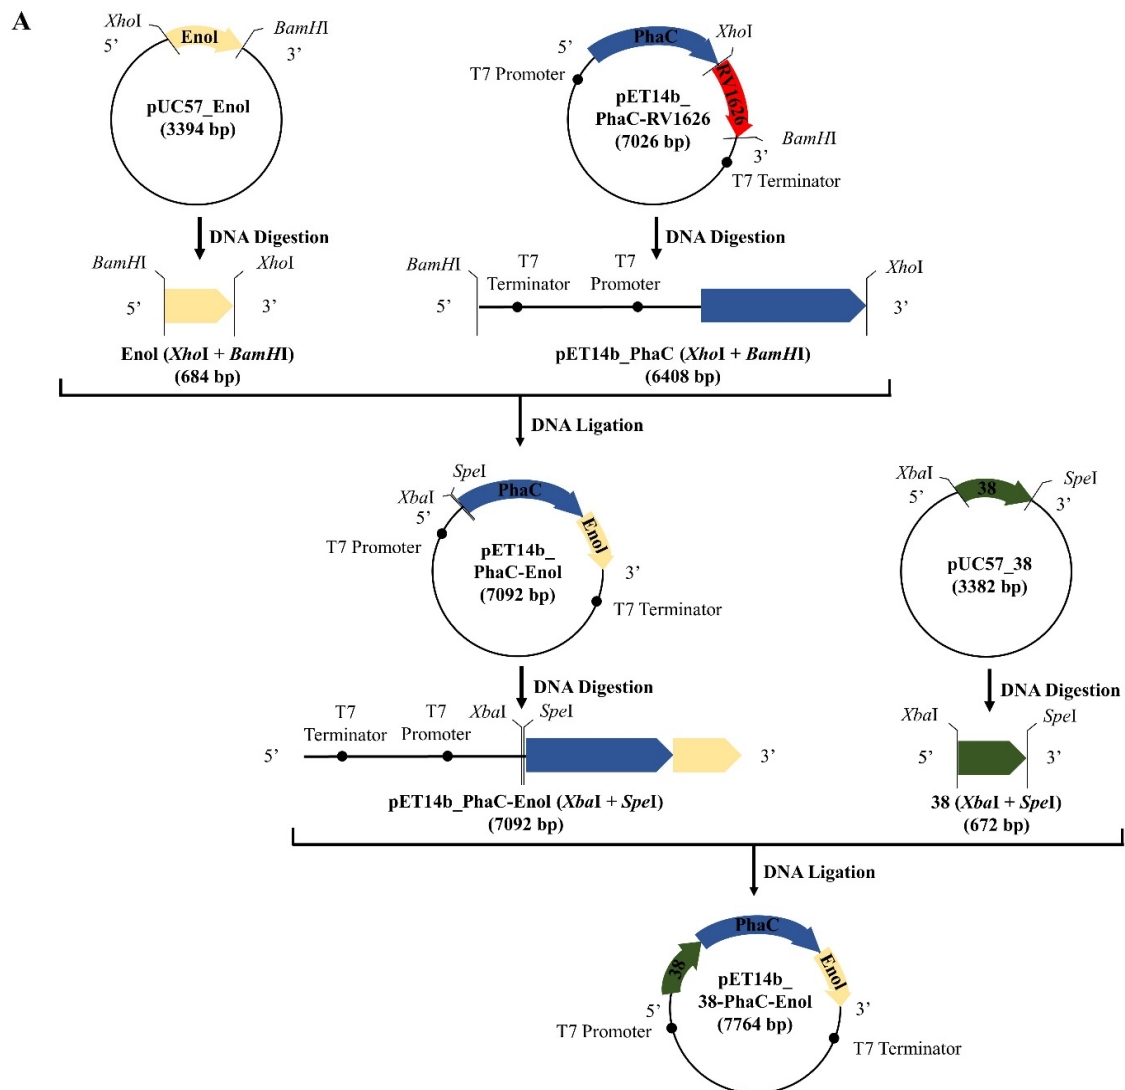

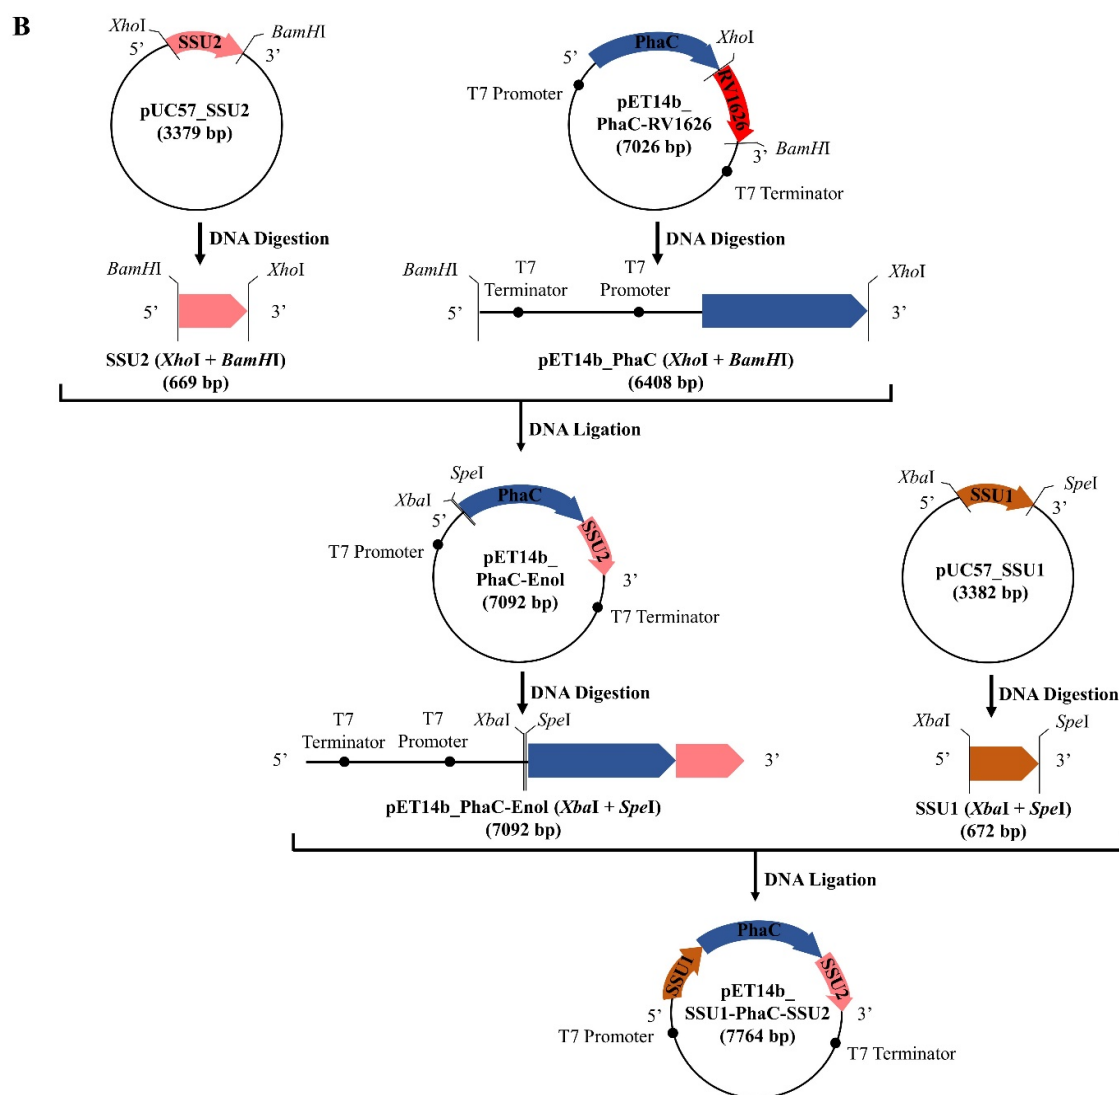

**Figure S1.** Plasmid construction of pET14b\_38-PhaC-Enol and pET14b\_SSU1-PhaC-SSU2 for 38-BP-Enol and SSU1-BP-SSU2 production in *E. coli* strain ClearColi™, respectively. (A) The DNA fragments encoding the 38 and *enol* genes were isolated from pUC57\_38 and pUC57\_Enol by DNA hydrolysis, respectively. The Enol fragment was introduced first to the 3' end of PhaC by replacing RV1626 into *XhoI/BamHI* sites, resulting to pET14b\_PhaC-Enol. Subsequently, the 38 fragment was inserted into the *XbaI/SpeI* sites to the 5' end of PhaC-Enol, generating the final plasmid pET14b\_38-PhaC-Enol. (B) The DNA fragments encoding the *SSU1* and *SSU2* genes were isolated from pUC57\_SSU1 and pUC57\_SSU2 by DNA hydrolysis, respectively. The SSU2 fragment was introduced first to the 3' end of PhaC by replacing RV1626 into *XhoI/BamHI* sites, resulting to pET14b\_PhaC-SSU2. Subsequently, the SSU1 fragment was inserted into the *XbaI/SpeI* sites to the 5' end of PhaC-SSU2, generating the final plasmid pET14b\_SSU1-PhaC-SSU2. PhaC is the BP synthase.

**Table S2.** Q-TOF-MS analysis of PhaC and PhaC-fusion proteins.

| Protein Sequence*                                                                                                                                                                                                                                                                                                                                                                                                                                                                                                                                                                                                                                                                                                                                                                                                                                                                                                                                                                                                                                                                                                                                                                                                                                                                                                                                                                                                                                                                                                                                                 | Protein sequence coverage and the confirmed fragments                                                                                                                                                                                                                        |
|-------------------------------------------------------------------------------------------------------------------------------------------------------------------------------------------------------------------------------------------------------------------------------------------------------------------------------------------------------------------------------------------------------------------------------------------------------------------------------------------------------------------------------------------------------------------------------------------------------------------------------------------------------------------------------------------------------------------------------------------------------------------------------------------------------------------------------------------------------------------------------------------------------------------------------------------------------------------------------------------------------------------------------------------------------------------------------------------------------------------------------------------------------------------------------------------------------------------------------------------------------------------------------------------------------------------------------------------------------------------------------------------------------------------------------------------------------------------------------------------------------------------------------------------------------------------|------------------------------------------------------------------------------------------------------------------------------------------------------------------------------------------------------------------------------------------------------------------------------|
| PhaC (MW: 64.2 kDa)                                                                                                                                                                                                                                                                                                                                                                                                                                                                                                                                                                                                                                                                                                                                                                                                                                                                                                                                                                                                                                                                                                                                                                                                                                                                                                                                                                                                                                                                                                                                               |                                                                                                                                                                                                                                                                              |
| 1 MATGKGAAASTQEGKSQPFK <b>VTPGPFDPATWLEWSRQWQGTEGNHAAAS</b><br>51 <b>GIPGLDALAGVKIAPAQLGDIQQR</b> YMKDFSALWQAMAEGKAEATGPLHDR<br>101 RFAGDAWRTNLPYR <b>FAAAFYLLNARALTELADEADAKTRQIRFAISQ</b><br>151 <b>WVDAMSPANFLATNPEAQRLLIESGGESLRAGVRNMMDLTRGKISQ</b> TDE<br>201 <b>SAFEVGRNAVTEGAVVFENEYFQLLQYKPLTDKVHARPLLMVPPCINKY</b><br>251 <b>YILDLPESLVRHVVEQGHTVFLVSWRNP</b> DASMAGSTWDDYIEHAAIRA<br>301 IEVAR <b>DISGQDKINVLGFCVGGTIVSTALAVLAARGEHPAASVTLLTLL</b><br>351 <b>DFADTGILDVVFDEGHVQLREATLG</b> GGAGAPCALLRGLLEANTFSFLRPN<br>401 <b>DLVWNYVVDNYLKGNTVPFDLLFWNGDATNLP</b> GPWYCWYLRHTYLQNEL<br>451 KVPGL <b>TVCGVPVDLASIDVPTYIYGSREDHIVP</b> WTAAYASTALLANKLR<br>501 <b>FVLGASGHIAGVINPPAKNKR</b> SHWTNDALPESPQQWLAGAIEHHGSWWPD<br>551 <b>WTAWLAGQAGAKRAAPANYGNARYRAIEPAPGRYVKAKA</b>                                                                                                                                                                                                                                                                                                                                                                                                                                                                                                                                                                                                                                                                                                                                                                        | 79%<br>V21-R74, D78-K90, F115-T140, F146-R180, N185-K234, Y250-R299, D306-R442, L456-K498, F501-K518, R521-562                                                                                                                                                               |
| 38-PhaC-Enol (MW: 111.6 kDa)                                                                                                                                                                                                                                                                                                                                                                                                                                                                                                                                                                                                                                                                                                                                                                                                                                                                                                                                                                                                                                                                                                                                                                                                                                                                                                                                                                                                                                                                                                                                      |                                                                                                                                                                                                                                                                              |
| 1 MRRIKETAEASDMGA-LINKER-RIIKETAEASDMGA-LINKER-RIIKETAEASD<br>51 MGA-LINKER-RIIKETAEASDMGA-LINKER-RIIKETAEASDMGA-LINKER-RIIK<br>101 ETAEASDMGA-LINKER-KRALEK <b>VRGESFDV-LINKER-KRALEKVRGESFDVGP</b><br>151 <b>GPGKR</b> ALEK <b>VRGESFDV-LINKER-KRALEKVRGESFDV-LINKER-KRALEKVRG</b><br>201 <b>ESFDV-LINKER-KRALEKVRGESFDV</b> SATGKGAAASTQEGKSQPFK <b>VTPGPF</b><br>251 DPATWLEWSRQWQGTEGNHAAA <b>GIPGLDALAGVKIAPAQLGDIQQR</b> YM<br>301 KDFSALWQAMAEGKAEATGPLHDDR <b>FAGDAWRTNLPYRFAAAFYLLNARA</b><br>351 LTELADAVEADAKTRQIRFAISQ <b>WVDAMSPANFLATNPEAQRLLIESGG</b><br>401 <b>ESLR</b> AGVRNMMDLTRGK <b>ISQ</b> TDES <b>AFEVGRNAVTEGAVVFENEYFQLL</b><br>451 QYKPLTDKVHARPLLMVPPCINKY <b>YYILDLPESLVRHVVEQGHTVFLVS</b><br>501 <b>WRNP</b> DASMAGSTWDDYIEHAAIRAIEVAR <b>DISGQDKINVLGFCVGGTIVS</b><br>551 TALAVLAARGEHPAASVTLLTLL <b>DFADTGILDVVFDEGHVQLREATLGG</b><br>601 <b>GAGAPCALLR</b> GLELANTFSFLRPNDLVWNYVVDNYLKGNTVPFDLLFWN<br>651 GDATNLPGPWYCWYLRHTYLQNELKVPGL <b>TVCGVPVDLASIDVPTYIYG</b><br>701 SREDHIVPWTAAAYASTALLANKLR <b>FVLGASGHIAGVINPPAKNKR</b> SHWTN<br>751 DALPESPQQWLAGAIEHHGSWWPDWT <b>AWLAGQAGAKRAAPANYGNARYRA</b><br>801 IEPAPGRYVKAKAHMVLAV <b>AIDKRGGGGGLECASSEFYDKERK</b> VY-LINKER-<br>851 <b>CASSEFYDKERK</b> VY-LINKER-CASSEFYDKERK <b>VY-LINKER-CASSEFYDKERK</b><br>901 <b>VY-LINKER-CASSEFYDKERK</b> VY-LINKER-CASSEFYDKERK <b>VY-LINKER-KFEGE</b><br>951 <b>GAAVRTSAE-LINKER-KFEGE</b> GAAVRTSAE-LINKER-KFEGE <b>GAAVRTSAEGPG</b><br>1001 <b>PGKFEGEGAAVRTSAE-LINKER-KFEGE</b> GAAVRTSAE-LINKER-KFEGE <b>GAAVR</b><br>1051 TSAE | 41%<br>V122-R136, V141-R155, V160-R174, V179-R193, V198-R212, I287-R298, F326-R332, F339-R349, L394-G400, E401-R404, I419-R431, Y474-S500, W501-R523, E595-G600, G601-R610, A788-R797, R824-G850, C851-K900, V901-E950, G951-G1000, P1001-R1050                              |
| SSU1-PhaC-SSU2 (MW: 110 kDa)                                                                                                                                                                                                                                                                                                                                                                                                                                                                                                                                                                                                                                                                                                                                                                                                                                                                                                                                                                                                                                                                                                                                                                                                                                                                                                                                                                                                                                                                                                                                      |                                                                                                                                                                                                                                                                              |
| 1 <b>MQLSELT</b> LADDSKAD-LINKER- <b>QLSELT</b> LADDSKAD-LINKER- <b>QLSELT</b> LADDS<br>51 <b>KAD-LINKER-DATNEVPANTEARE-LINKER-DATNEVPANTEARE-LINKER-DATN</b><br>101 <b>EV</b> PANTEARE-LINKER-AETETPAESIRVQA-LINKER-AETETPAESIRV <b>QAGP</b><br>151 <b>GPGAETETPAESIRVQA-LINKER-APISNKKTEKASGN-LINKER-APISNKKTE</b><br>201 <b>KASGN-LINKER-APISNKKTEKASGN</b> SATGKGAAASTQEGKSQPFK <b>VTPGPF</b><br>251 <b>DPATWLEWSRQWQGTEGNHAAA</b> GIPGLDALAGVKIAPAQLGDIQQR <b>YM</b><br>301 <b>KDFSALWQAMAEGKAEATGPLHDDR</b> FAGDAWRTNLPYR <b>FAAAFYLLNARA</b><br>351 LTELADAVEADAKTRQIRFAISQ <b>WVDAMSPANFLATNPEAQRLLIESGG</b><br>401 <b>ESLR</b> AGVRNMMDLTRGK <b>ISQ</b> TDES <b>AFEVGRNAVTEGAVVFENEYFQLL</b><br>451 QYKPLTDKVHARPLLMVPPCINKY <b>YYILDLPESLVRHVVEQGHTVFLVS</b><br>501 <b>WRNP</b> DASMAGSTWDDYIEHAAIRAIEVAR <b>DISGQDKINVLGFCVGGTIVS</b><br>551 TALAVLAARGEHPAASVTLLTLL <b>DFADTGILDVVFDEGHVQLREATLGG</b><br>601 <b>GAGAPCALLR</b> GLELANTFSFLRPNDLVWNYVVDNYLKGNTVPFDLLFWN<br>651 GDATNLPGPWYCWYLRHTYLQNELKVPGL <b>TVCGVPVDLASIDVPTYIYG</b><br>701 SREDHIVPWTAAAYASTALLANKLR <b>FVLGASGHIAGVINPPAKNKR</b> SHWTN<br>751 <b>DALPESPQQWLAGAIEHHGSWWPDWTAWLAGQAGAKRAAPANYGNARYRA</b>                                                                                                                                                                                                                                                                                                                                                                          | 76%<br>Q2-W255, Q263-F303, Q308-F326, R332-Y337, L345-R349, L351-R365, V377-R404, T415-F442, Q448-F497, R502-H519, R523-L540, C543-L571, D576-C606, R610-F618, L621-W628, L636-F644, N650-W661, Y665-Y698, G700-K744, T749-H756, L780-Y808, A818-R824, N834-T898, A948-E1051 |

---

801 IEPAPGRYVKAKAHMVLAVAIDKRGGGGGLECNLPDTPSPTGTV-LINKER-  
851 CNNLPDTPSPTGTV-LINKER-CNNLPDTPSPTGTV-LINKER-PSDKKVTPTNKK  
901 GK-LINKER-PSDKKVTPTNKKGK-LINKER-PSDKKVTPTNKKGK-LINKER-TTAGK  
951 TTDESKEKE-LINKER-TTAGKTTDESKEKE-LINKER-TTAGKTTDESKEKEGPG  
1001 PGKDLRINTSPESLDE-LINKER-KDLRINTSPESLDE-LINKER-KDLRINTSPE  
1051 SLDE

---

\*Confirmed sequences are in red colour. MW (Molecular weight).

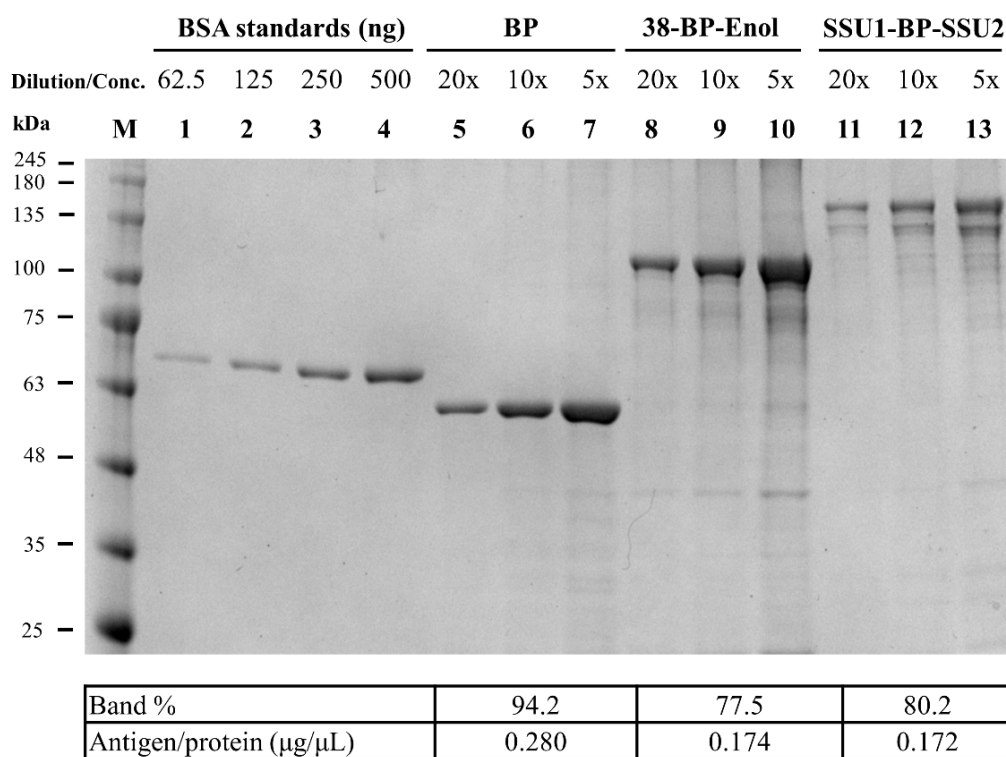

**Figure S2.** Protein quantification of the purified BP vaccines displaying *S. suis* antigens by densitometry. Different amounts of BSA standard ranging between 62.5 and 500 ng were loaded on Bis-Tris gel to generate a standard curve, and were used to determine the antigen concentrations. The image was taken by the gel doc (BioRad Laboratories, Hercules, CA), and analysed with the Image Lab software (BioRad Laboratories, Hercules, CA). M, marker.

**Table S3.** Particle size and zeta-potential measurements of the BP bead vaccines.

| BP beads             | Ave. Size (nm) | Std. dev. (Size) | Ave. PDI | Ave. Zeta Potential (mV) | Std. dev. (Zeta Potential) |
|----------------------|----------------|------------------|----------|--------------------------|----------------------------|
| TBS buffer (pH 7.5)  | -              | -                | -        | -3.89                    | 0.21                       |
| BP                   | 428            | 38.12            | 0.36     | -20.67                   | 0.40                       |
| 38-BP-Enol           | 397            | 15.36            | 0.35     | -12.53                   | 1.15                       |
| SSU1-BP-SSU2         | 312            | 27.54            | 0.30     | -23.03                   | 0.60                       |
| QuilA                | 388            | 31.37            | 0.59     | -26.70                   | 0.53                       |
| BP + QuilA           | 344            | 43.60            | 0.55     | -26.00                   | 0.40                       |
| 38-BP-Enol + QuilA   | 248            | 19.98            | 0.44     | -23.37                   | 1.50                       |
| SSU1-BP-SSU2 + QuilA | 292            | 30.88            | 0.51     | -25.97                   | 0.23                       |

Ave. (Average); Std. dev. (Standard deviation); PDI (Polydispersity index).



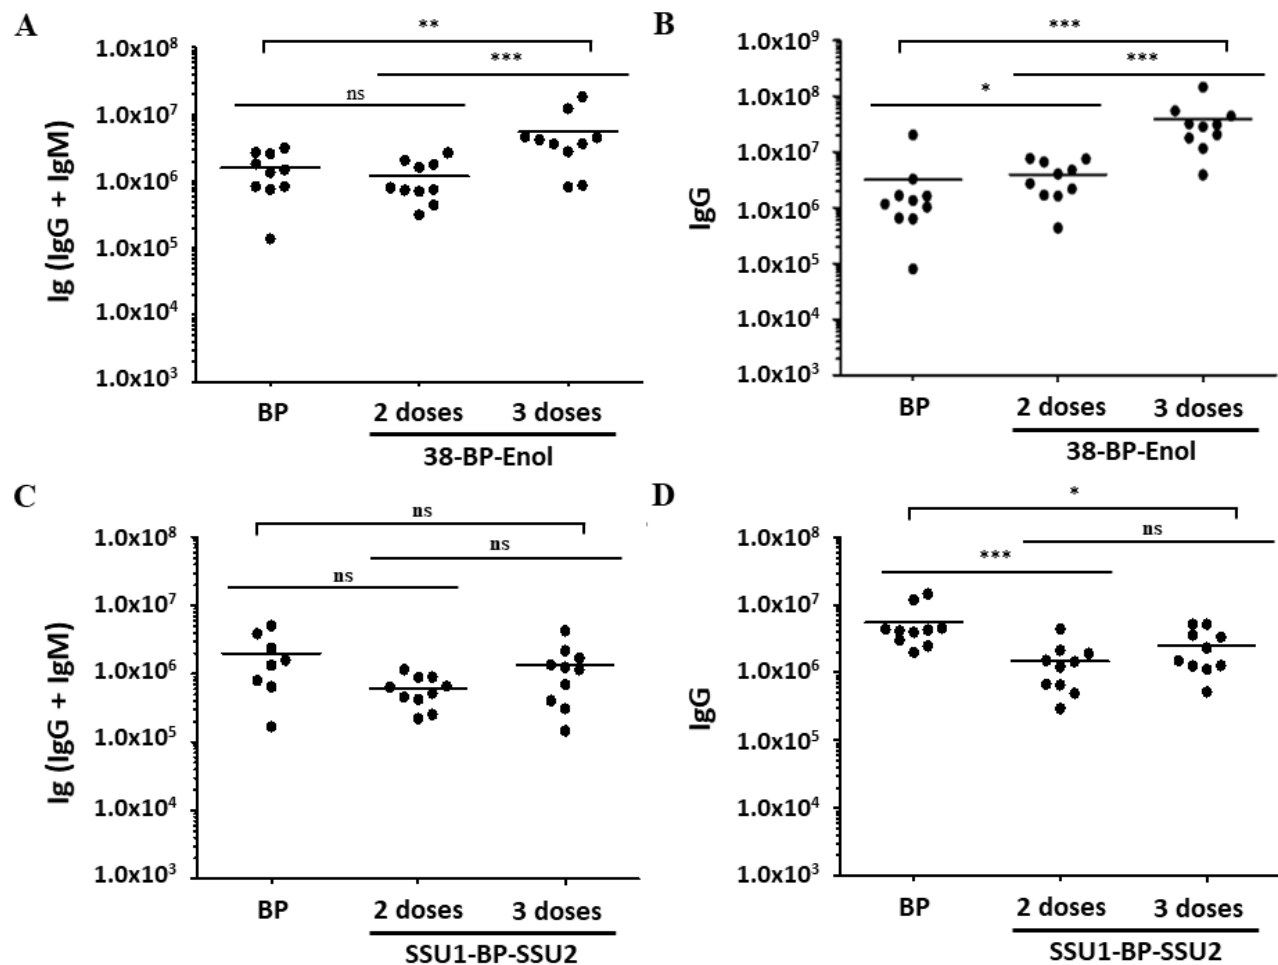

**Figure S3.** Two doses versus three doses of BP vaccines. (A) Ig [IgG + IgM] response induced by 38-BP-enol vaccination. (B) IgG response induced by 38-BP-Enol vaccination. (C) Ig [IgG + IgM] response induced by SSU-BP-SSU vaccination. (D) IgG response induced by SSU-BP-SSU vaccination. Mice ( $n = 10$ ) were immunized with 2 or 3 doses of 38-BP-Enol ( $6 \mu\text{g}$  dose) and SSU1-BP-SSU2 ( $6 \mu\text{g}$  dose) without adjuvant. BP control mice received 3 doses. Sera (day 28) from BP, or 2-dose or 3-dose vaccination were analyzed by ELISA using either BP or 38-BP-Enol or SSU1-BP-SSU2 as coating. Statistical analysis was performed using unpaired  $t$  tests Mann–Whitney. Each dot represents a single vaccinated mouse ( $n = 10$  mice per group), with horizontal bars representing the mean of the group.  $P$  values for each case tested were (A)  $**p < 0.007$ ,  $***p < 0.0007$ ; (B)  $***p < 0.0001$ ,  $***p < 0.0002$ ,  $*p < 0.04$ ; and (D)  $*p < 0.04$ ,  $***p < 0.0007$ . ns means not statistically significant.

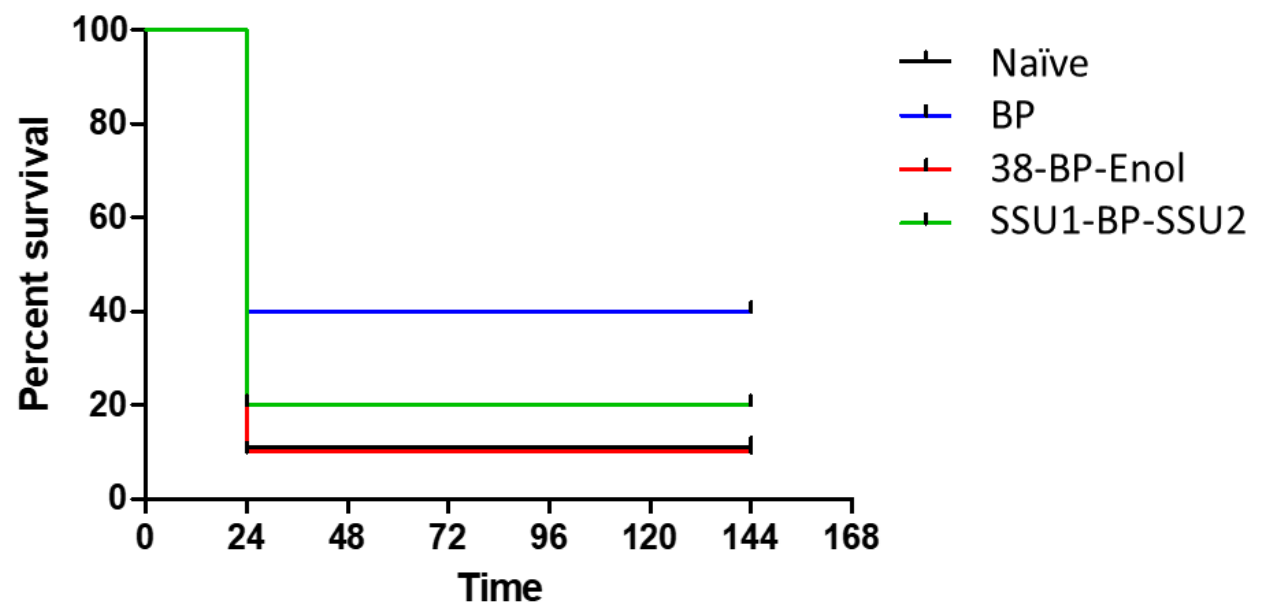

**Figure S4.** Survival of immunized C57BL/6 mice with two doses of vaccines + Quil-A® after challenge with  $5 \times 10^8$  CFU/mouse of *S. suis* serotype 2 virulent strain P1/7. Representative of one experiment with 10 mice per group.

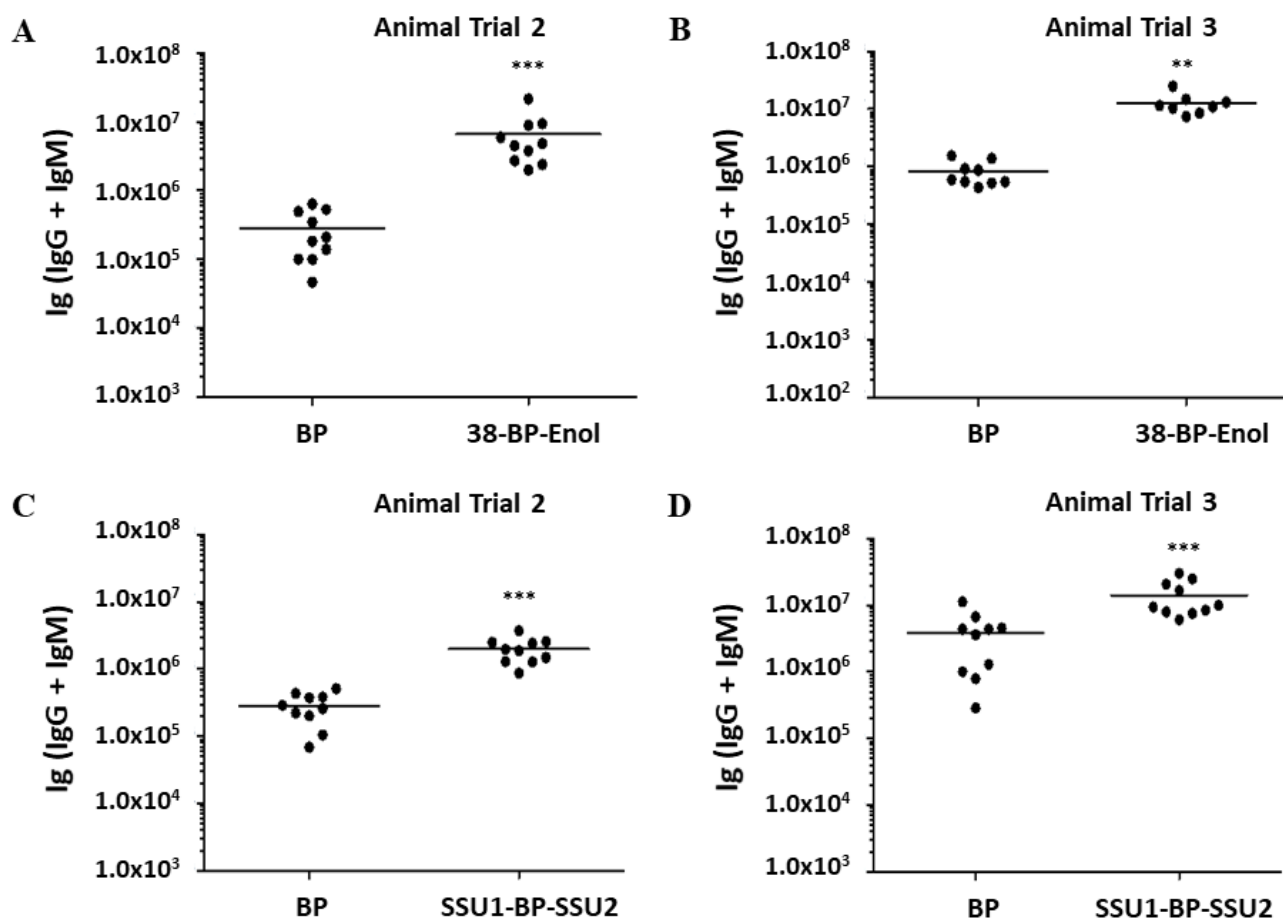

**Figure S5.** Ig [IgG + IgM] response induced by BP vaccines for the second and third animal trials. (A–B) Ig [IgG + IgM] response induced by 38-BP-Enol vaccination. (C–D) Ig [IgG + IgM] response induced SSU1-BP-SSU2 vaccination. Mice ( $n = 10$ ) were immunized with 2 doses of 38-BP-Enol ( $6 \mu\text{g}$  dose) and SSU1-BP-SSU2 ( $6 \mu\text{g}$  dose) with Quil-A® adjuvant. Immunogenicity was analyzed by ELISA using either BP or 38-BP-Enol or SSU1-BP-SSU2 as coating. Statistical analysis was performed using unpaired  $t$  tests Mann–Whitney. Each dot represents a single vaccinated mouse ( $n = 10$  mice per group), with horizontal bars representing the mean of the group.  $P$  values for each case tested were (A) \*\*\* $p < 0.0001$ , (B) \*\* $p < 0.0021$ , (C) \*\*\* $p < 0.0001$  and (D) \*\*\* $p < 0.0005$ .

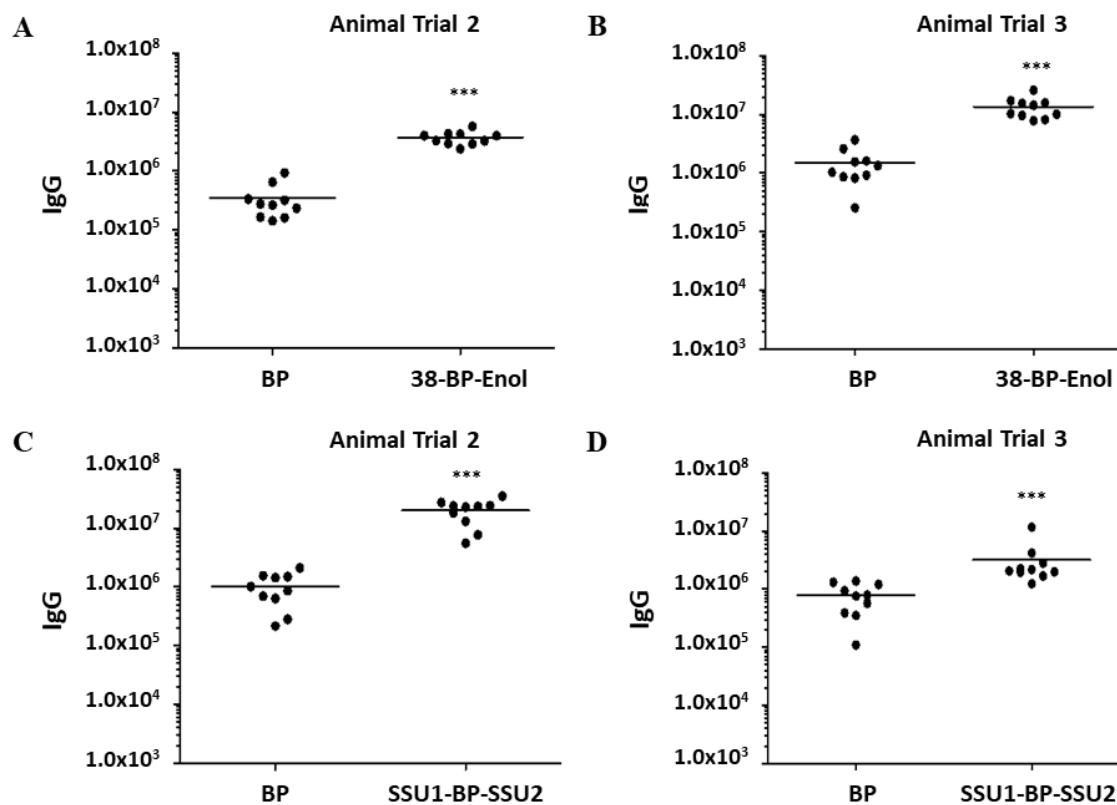

**Figure S6.** IgG response induced by BP vaccines for the second and third animal trials. (A,B) IgG response induced by 38-BP-Enol vaccination. (C,D) IgG response induced SSU1-BP-SSU2 vaccination. Mice ( $n = 10$ ) were immunized with 2 doses of 38-BP-Enol (6  $\mu\text{g}$  dose) and SSU1-BP-SSU2 (6  $\mu\text{g}$  dose) with Quil-A<sup>®</sup> adjuvant. Immunogenicity was analyzed by ELISA using either BP or 38-BP-Enol or SSU1-BP-SSU2 as coating. Statistical analysis was performed using unpaired t tests Mann–Whitney.  $P$  values for each case tested were (A)  $***p < 0.0001$ , (B)  $***p < 0.0001$ , (C)  $***p < 0.0001$  and (D)  $***p < 0.0001$ . Each dot represents a single vaccinated mouse ( $n = 10$  mice per group), with horizontal bars representing the mean of the group.

## References

1. Slater, J.; Allen, A.; May, J.; Bolitho, S.; Lindsay, H.; Maskell, D. Mutagenesis of *Streptococcus equi* and *Streptococcus suis* by transposon Tn917. *Veterinary microbiology*. **2003**, *93*, 197–206.
2. Amara, A.A.; Rehm, B.H. Replacement of the catalytic nucleophile cysteine-296 by serine in class II polyhydroxyalkanoate synthase from *Pseudomonas aeruginosa*-mediated synthesis of a new polyester: Identification of catalytic residues. *Biochemical Journal*. **2003**, *374*, 413–421.
3. Rubio Reyes, P.; Parlane, N.A.; Wedlock, D.N.; Rehm, B.H.A. Immunogenicity of antigens from *Mycobacterium tuberculosis* self-assembled as particulate vaccines. *Int. J. Med. Microbiol.* **2016**, *306*, 624–632.
4. Peters, V.; Rehm, B.H.A. In vivo monitoring of PHA granule formation using GFP-labeled PHA synthases. *FEMS Microbiol Lett.* **2005**, *248*, 93–100.
